## Tunable genetic devices through simultaneous control of transcription and translation

Vittorio Bartoli<sup>1,2</sup>, Grace A. Meaker<sup>3</sup>, Mario di Bernardo<sup>1,2,4</sup> and Thomas E. Goroehowski<sup>1,5,\*</sup>

<sup>1</sup> BrisSynBio, University of Bristol, Life Sciences Building, Tyndall Avenue, Bristol, UK

<sup>2</sup> Department of Engineering Mathematics, University of Bristol, Woodland Road, Bristol, UK

<sup>3</sup> School of Biosciences, Cardiff University, Museum Avenue, Cardiff, UK

<sup>4</sup> Department of Electrical Engineering and Information Technology, University of Naples Federico II, Via Claudio 21, Napoli, Italy

<sup>5</sup> School of Biological Sciences, University of Bristol, Bristol, Tyndall Avenue, UK

\* Correspondence should be addressed to T.E.G. ([thomas.goroehowski@bristol.ac.uk](mailto:thomas.goroehowski@bristol.ac.uk))

**Keywords:** gene regulation; genetic circuits; transcription; translation; toehold switch; synthetic biology; systems biology.

1 **Abstract**

2 Synthetic genetic circuits allow us to modify the behavior of living cells. However, changes in  
3 environmental conditions and unforeseen interactions between a circuit and the host cell can  
4 cause deviations from a desired function, resulting in the need for time-consuming physical  
5 re-assembly to fix these issues. Here, we use a regulatory motif that controls transcription and  
6 translation to create genetic devices whose response functions can be dynamically tuned.  
7 This approach allows us, after construction, to shift the 'on' and 'off' states of a sensor by 4.5-  
8 and 28-fold, respectively, and modify genetic NOT and NOR logic gates to allow their  
9 transitions from an 'on' to 'off' state to be varied over a >6-fold range. In all cases, tuning leads  
10 to trade-offs in the fold-change and separation between the distributions of cells in 'on' and  
11 'off' states. By using mathematical modelling, we derive design principles that help to further  
12 optimize the performance of these devices. This work lays the foundation for adaptive genetic  
13 circuits that can be tuned after their physical assembly to maintain functionality across diverse  
14 environments and design contexts.

## 15 Introduction

16 Gene regulatory networks, or genetic circuits as they are often known, govern when and where  
17 genes are expressed in cells and control core biochemical processes like transcription and  
18 translation<sup>1,2</sup>. The ability to synthesize DNA encoding engineered genetic circuits offers a  
19 means to expand the capabilities of a cell and reprogram its behavior<sup>1,3</sup>. Synthetic genetic  
20 circuits have been built to implement computational operations<sup>4–12</sup>, dynamic behaviors like  
21 oscillations<sup>13–15</sup>, and even coordinate multicellular actions across a population<sup>16–20</sup>.

22 The ability to reprogram living cells is simplified by using genetically encoded devices  
23 that use common input and output signals<sup>1,2,7,9</sup>. This allows the output of one device to be  
24 directly connected to the input of another to create circuits implementing more complex  
25 functionalities. Signals can take many forms, but one of the most commonly used is RNA  
26 polymerase (RNAP) flux in which promoters are used to guide this signal to specific points in  
27 a circuit's DNA<sup>7,21</sup>. Based on such input and output signals, the response function of a genetic  
28 device captures how inputs map to outputs at steady state<sup>1,7,21</sup>. By ensuring the response  
29 functions of two devices are compatible, i.e. they are “matched” such that the range of the  
30 output of the first device spans the necessary range of inputs for the second device, larger  
31 circuits with desired functions can be constructed<sup>22</sup>. Matching of components is vital in circuits  
32 where devices exhibit switching behaviors (e.g. for Boolean logic) to ensure input signals are  
33 sufficiently separated to accurately trigger required transitions between ‘on’ and ‘off’ states as  
34 signals propagate through the circuit.

35 Although the use of characterized genetic devices has enabled the automated design  
36 of large genetic circuits<sup>7,23</sup>, the response functions of these devices are often sensitive to  
37 many factors. For example, differences in host physiology due to culturing conditions<sup>24–26</sup> and  
38 interactions between genetic parts and the host cell<sup>27–32</sup>, can all affect the response function  
39 of a device and subsequently its compatibility within a circuit. This makes the creation of  
40 reliable and robust genetic circuits a challenge. Even when considering carefully controlled  
41 conditions, like those in the lab, a genetic circuit often needs to be reassembled from scratch  
42 multiple times using alternative parts until a working combination is found. This is both time  
43 consuming and expensive, and often has to be repeated if the circuit is to be deployed in  
44 slightly different conditions or host strains.

45 In this work, we tackle this problem by developing genetic devices whose response  
46 functions can be dynamically tuned after physical assembly to correct for unwanted changes  
47 in their behavior. The ability to tune/modify the steady state input-output relationship is made  
48 possible by employing a simple regulatory motif. We show how this motif can be connected to  
49 small molecule sensors to characterize its function and then illustrate how it can be used in  
50 practice by integrating it into genetic NOT and NOR logic gates<sup>33</sup> to allow for the tuning of the

51 transition point between ‘on’ and ‘off’ states. These capabilities make these devices more  
52 broadly compatible with other components <sup>1,7,22</sup>, but their use comes at a cost because of  
53 trade-offs in their performance. As we tune the devices, a decrease in the dynamic range is  
54 observed and the ability to differentiate ‘on’ and ‘off’ states due to variability in gene expression  
55 across a population. We use mathematical modelling to better understand these limitations  
56 and derive design principles that are then used to further optimize their design. This work is a  
57 step towards genetic circuitry whose individual components can functionally adapt, ensuring  
58 robust system-level behaviors are maintained no matter the genetic, cellular or environmental  
59 context.

60

## 61 **Results**

### 62 ***Controlling transcription and translation using a tunable expression system***

63 To allow for the response of a genetic device to be modulated, we developed a tunable  
64 expression system (TES) based on a simple regulatory motif where two separate promoters  
65 control the transcription and translation rates of a gene of interest (**Figure 1a**). By using  
66 promoters as inputs, it is possible to easily connect a TES to existing genetic  
67 components/circuitry or even endogenous transcriptional signals within a cell. The TES  
68 consists of a toehold switch (THS) that enables the translation initiation rate of the gene of  
69 interest to be varied by the relative concentration of a “tuner” small RNA (sRNA) <sup>6,34</sup>. The main  
70 component of the THS is a 92 bp DNA sequence that encodes a structural region and a  
71 ribosome binding site (RBS) used to drive translation of a downstream protein coding region.  
72 This is expressed from a promoter that acts as the main input to the TES (**Figure 1a**). When  
73 transcribed, the structural region of the THS mRNA folds to form a hairpin loop secondary  
74 structure that makes the RBS less accessible to ribosomes and thus reduces its translation  
75 initiation rate. This structure is disrupted by a second component, a 65 nt tuner sRNA that is  
76 complementary to the first 30 nt of the THS <sup>34</sup>. The tuner sRNA is expressed from a second  
77 promoter, which acts as a tuner input to the device (**Figure 1a**). Complementarity between the  
78 tuner sRNA and a short unstructured region of the toehold switch enables initial binding, which  
79 then makes it thermodynamically favorable for the sRNA to unfold the secondary structure of  
80 the THS through a branch migration process. This makes the RBS more accessible to  
81 ribosomes which increases the translation initiation rate. Relative concentrations of the THS  
82 mRNA and tuner sRNA (controlled by the input and tuner promoters) enable the rate of  
83 translation initiation to be potentially varied over a 100-fold range for the toehold switch design  
84 we selected for our own <sup>34</sup> (**Materials and Methods**). However, THS designs exist which allow  
85 for up to a 400-fold change in translation initiation rates <sup>6,34</sup>.

86 We selected as main and tuner inputs for the TES the output promoters of two sensors,  
87  $P_{tet}$  and  $P_{tac}$ , that respond to anhydrotetracycline (aTc) and isopropyl  $\beta$ -D-1-  
88 thiogalactopyranoside (IPTG), respectively (**Figure 1b**). This allows us to dynamically tune  
89 transcription and translation rates of a gene to modify the overall rate of protein production.  
90 Each sensor consists of a transcription factor (TetR and LacI sensitive to aTc and IPTG,  
91 respectively) that represses its cognate promoter until an associated small molecule is present  
92 (**Figure 1b**). The small molecules bind their cognate transcription factor, altering its  
93 conformation and limiting its ability to repress the promoter, thereby turning on transcription of  
94 the downstream gene. Yellow fluorescent protein (YFP) was used as the output from the TES  
95 (**Figure 1b**) to allow us to measure the rate of protein production in single cells using flow  
96 cytometry.

97 Characterization of the device was performed in *Escherichia coli* cells grown in  
98 different concentrations of aTc (input) and IPTG (tuner). Steady state fluorescence  
99 measurements of single cells in exponential growth phase were taken using flow cytometry  
100 and promoter activities of both the main and tuner input were measured in relative promoter  
101 units (RPUs) to allow for direct comparisons (**Materials and Methods; Supplementary**  
102 **Figure S1**). A further advantage of characterizing our devices in RPUs is that this data can be  
103 immediately used within genetic design automation software like Cello<sup>7</sup>, allowing our parts to  
104 be interfaced with a large library of existing sensors and logic gates<sup>33,35</sup>.

105 For a fixed tuner promoter activity, we observed a sigmoidal increase in output YFP  
106 fluorescence as the input promoter activity increased from 0.002 to 6.6 RPU (**Figure 1c**). As  
107 the activity of the tuner promoter increased from 0.002 to 2.6 RPU, the entire response  
108 function shifted upwards to higher output YFP fluorescence levels. Notably, this shift was not  
109 uniform, with larger relative increases seen for lower input promoter activities; 28-fold versus  
110 4.5-fold for inputs of 0.002 and 6.6 RPU, respectively (**Figure 1c**). Closer analysis of the flow  
111 cytometry data (**Figure 1d**), showed that these changes arose from the distributions of output  
112 YFP fluorescence for low and high inputs shifting uniformly together as the tuner promoter  
113 activity was increased. Therefore, even though a similar relative difference between outputs  
114 for low and high inputs (also referred to as the dynamic range) was observed for all tuner  
115 inputs, when the tuner input is low, the distributions are virtually identical to the  
116 autofluorescence of the cells (**Figure 1d**). This leads to even small absolute differences in the  
117 median values between low and high input states resulting in high fold-changes.

118 Flow cytometry data also showed a significant overlap in the output YFP fluorescence  
119 distributions for low and high input promoter activities (**Figure 1d**). Many applications require  
120 that 'on' and 'off' states in a system are well separated so that each can be accurately  
121 distinguished (e.g. for Boolean logic). To assess this separation in the TES, we calculated the  
122 fractional overlap between the output YFP fluorescence distributions for low and high input

123 promoter activities (**Materials and Methods**). We found a constant intersection of ~70%  
124 across all tuner promoter activity levels (**Figure 1e**), which resulted from the similar shifts we  
125 see in output across all input promoter activities (**Figure 1d**).

126 To better understand these effects, we derived a deterministic ordinary differential  
127 equation (ODE) model of the system (**Supplementary Text S1**). Simulations of this model for  
128 biologically realistic parameters (**Supplementary Table S1**) showed similar qualitative  
129 behavior to the experiments; increasing tuner promoter activity shifted the response curve to  
130 higher output protein production rates (**Figure 1f**). However, unlike the experiments, increases  
131 in the tuner promoter activity resulted in a small increase in the fold-change in the output  
132 between low and high inputs (**Figure 1g**, bottom). The limiting effect that the tuner sRNA can  
133 have is a possible mechanism that could account for the non-linear response observed in the  
134 experiments, whereby 'on' states do not increase as quickly as 'off' states as the tuner activity  
135 increases (**Figure 1g**, top). Because the tuner sRNA concentration is fixed for each response  
136 function, its concentration could be higher than the concentration of THS transcript when the  
137 main input is low, while also being much lower when the main input is high. This would cause  
138 the rate of protein production to be limited by the THS transcript concentration at low inputs,  
139 and by the tuner sRNA concentration at high inputs.

140 Another potential cause of this non-linear response could be retroactivity that occurs  
141 when the behavior of components in a biological circuit change once interconnected<sup>36,37</sup>. Such  
142 effects break modularity in the system and can make it difficult to predict the behavior of larger  
143 complex circuits. To explore this aspect further, we coupled our existing model to another that  
144 is able to capture retroactivity-like effects due to shifts in ribosome allocation between  
145 endogenous genes and synthetic constructs, such as the TES (**Supplementary Text S2**)  
146<sup>28,36,37</sup>. Ribosomes are a key cellular resource and fluctuations in their availability due to the  
147 additional burden of a synthetic construct can cause drops in protein synthesis rates across  
148 the cell, affecting upstream components in a circuit<sup>25,27,29,32</sup>. Comparisons between the original  
149 models and this coupling variant, showed that retroactivity did have an effect for biologically  
150 realistic parameters, but only when the output caused a significant burden on the cell and only  
151 for the most highly expressed outputs, i.e., when both the input and tuner promoter activities  
152 were high (**Supplementary Figure S2**).

153

### 154 ***Design and assembly of a tunable genetic NOT gate***

155 Some genetic devices rely on the expression of proteins such as transcription factors to  
156 implement basic logic functions that can be composed to carry out more complex decision-  
157 making tasks<sup>4,7,8</sup>. One such commonly used device is a NOT gate, which has a single input  
158 and output<sup>33</sup>. The function of this gate is to "invert" the input such that the output is high if the  
159 input is low and vice versa. Such a behavior can be implemented by using promoters as the

160 input and output, with the input promoter driving expression of a repressor protein that binds  
161 to the DNA of the constitutive output promoter. When the input promoter is inactive, the  
162 repressor is not synthesized and so the constitutive output promoter is active. However, once  
163 the input promoter is activated, the repressor is expressed which binds the output promoter  
164 and represses its activity.

165 Because the activity range of promoters varies, the transition point, whereby sufficient  
166 concentrations of repressor are present to cause strong repression of the output promoter,  
167 may make it impossible to connect other devices and ensure a signal is correctly propagated.  
168 For example, the output promoter of a weak sensor system acting as input to a NOT gate with  
169 a high transition point may produce insufficient repressor, causing the output promoter to be  
170 continually active. These incompatibilities can sometimes be corrected for by modifying other  
171 regulatory elements in the design. In the case of a repressor-based NOT gate, while the  
172 promoters cannot be easily changed, in bacteria the translation initiation rate can be varied by  
173 altering the ribosome binding site (RBS) for the repressor gene. Increasing the RBS strength  
174 causes more repressor protein to be produced for the same input promoter activity, shifting  
175 the transition point to a lower value<sup>7,33</sup>. While such modifications can fix issues with device  
176 compatibility, they require reassembly of the entire genetic device.

177 Given that the TES allows for the rates of both transcription and translation to be  
178 dynamically controlled, we attempted to create a proof-of-concept “tunable” NOT gate that  
179 integrated the TES to allow its response function, and crucially the transition point, to be  
180 altered after physical assembly. We chose an existing NOT gate design<sup>33</sup> that uses the PhIF  
181 repressor to control the activity of an output  $P_{phIF}$  promoter (**Figure 2a**). Expression of PhIF  
182 was controlled by the TES (replacing the YFP reporter protein in the original TES design;  
183 **Figure 1a**). Unlike the TES, the tunable NOT gate uses promoters for both inputs and outputs  
184 allowing it to be easily connected to other devices that use RNAP flux as an input/output signal  
185<sup>7,21</sup> (**Figure 2a**).

186 To enable characterization of the tunable NOT gate, the output promoter  $P_{phIF}$  was  
187 used to drive expression of YFP. Measurements were taken using flow cytometry for cells  
188 harboring the device in varying concentrations of aTc and IPTG, and steady state response  
189 functions were generated (**Figures 2b** and **2c**). As expected, these displayed a negative  
190 sigmoidal shape with transition points ( $K$  values from the Hill function fits to the experimental  
191 data) that varied over a 7-fold range (**Figure 2b**). We also found that increases in the tuner  
192 promoter activity lead to transitions at lower activity levels for the input promoter. The range  
193 of transition points achieved by our device also covered a high proportion (35%) of the largest  
194 collection of repressor-based NOT gates built to date (total of 20 variants; **Figure 2d**)<sup>7</sup>.

195 These results demonstrate the ability of the proposed TES component to dynamically  
196 alter a key characteristic of a NOT gate’s response function (specifically the transition point)

197 to improve its compatibility with other genetic devices. However, it came at a cost; tuning  
198 resulted in a drop in the fold-change between low and high outputs (**Figure 2e**) and an  
199 increase in the overlap of the output YFP fluorescence distributions, which made high and low  
200 states difficult to distinguish (**Figure 2f**).

201

### 202 ***Boosting sRNA levels improves the performance of the tunable genetic devices***

203 For the THS to function correctly, it is essential that the sRNA reaches a sufficiently high  
204 concentration relative to the THS transcript to ensure the associated RBS is in a predominantly  
205 exposed state<sup>34</sup>. In our design, the tuner promoter  $P_{tac}$  has less than half the maximum  
206 strength of the main input promoter  $P_{tet}$  (**Supplementary Figure S1**). Furthermore, although  
207 the tuner sRNA contains a hairpin to improve its stability, sRNAs are generally more quickly  
208 turned over than normal transcripts<sup>38,39</sup>, yielding much lower steady state concentrations  
209 compared to the THS transcript.

210 To better understand the role that the THS transcript to tuner sRNA ratio had on the  
211 performance of the TES, we used our mathematical model of the system (**Supplementary**  
212 **Text S1**) to explore how various key parameters (e.g. transcription rates and binding affinities)  
213 affected the response function of the device. Using biologically realistic ranges of parameters  
214 (**Supplementary Table S1**), we found that for lower sRNA transcription rates the output  
215 response function could be shifted maintaining a similar fold-change between low and high  
216 output states (**Figure 3a**). At these low THS/sRNA ratios the translation rate from the THS  
217 transcript is limited by the sRNA concentration. However, as the sRNA transcription rate  
218 increased a transition point was seen (i.e. between green and blue shared curves in **Figure**  
219 **3a**) whereby for low THS transcription rates the sRNAs are in excess making the output protein  
220 production rate limited by the THS transcript concentration (**Figure 3a**). In contrast, at high  
221 THS transcription rates the sRNAs become limiting again but allow for relatively much higher  
222 output protein production rates that enable a larger fold-change in the response function of  
223 the TES (**Figure 3a**). Further stochastic modelling of the system showed that increased sRNA  
224 transcription rates also reduced variability in the distribution of protein production rates across  
225 a population and lowered the fractional intersection between low and high output states  
226 (**Figure 3b**).

227 To experimentally verify the benefit of increasing the sRNA transcription rate, we built  
228 a complementary sRNA booster plasmid that contained a high-copy pColE1 origin of  
229 replication (50–70 copies per cell)<sup>40</sup> and expressed the tuner sRNA from a strong viral  $P_{T7}$   
230 promoter (**Figure 3c**)<sup>41</sup>. Transcription from  $P_{T7}$  requires T7 RNA polymerase (T7RNAP). This  
231 is provided by our host strain *E. coli* BL21 Star (DE3), which has the *T7RNAP* gene under the  
232 control of an IPTG inducible  $P_{lacUV5}$  promoter within its genome (**Figure 3c**)<sup>42</sup>. Using IPTG,  
233 induction of the tuner  $P_{tac}$  promoter in our devices using IPTG leads to simultaneous



234 expression of T7 RNAP from the host genome and transcription of additional tuner sRNA from  
235 the booster plasmid (**Figure 3c**). As the tunable devices are encoded on a plasmid with a  
236 p15A origin of replication (~15 copies per cell; **Supplementary Figure S3**)<sup>43</sup>, we would expect  
237 at least five times higher tuner sRNA concentrations are reached when the sRNA booster is  
238 present.

239 Cells were co-transformed with each tunable genetic device and sRNA booster  
240 plasmid, and their response functions were measured (**Figures 3D** and **3E**). As predicted by  
241 the modelling, the TES displayed improved performance with a more than doubling in the fold-  
242 change across all tuner promoter activities and a >40% drop in the intersection between low  
243 and high output YFP fluorescence distributions (**Table 1**). For the tunable NOT gate only minor  
244 differences in performance were seen with mostly small decreases in fold-change for high  
245 tuner promoter activities.

246

### 247 ***Self-cleaving ribozyme insulators impact toehold switch function***

248 In our initial designs, a RiboJ self-cleaving ribozyme was included in the TES and NOT gate  
249 to insulate the translation of the *yfp* or *phlF* genes, respectively, from different 5' untranslated  
250 region (UTR) sequences that might be generated when using different promoters as an input  
251 (**Figures 1a, 2a**)<sup>44</sup>. Any variable UTR sequences would be cleaved at the RiboJ site to  
252 produce a standardized mRNA with more consistent rates of mRNA degradation and  
253 translation. Unfortunately, because RiboJ contains a number of strong secondary RNA  
254 structures<sup>44,45</sup>, it is possible that the 23 nt hairpin at the 3'-end impacts the ability for the sRNA  
255 to interact with the THS, reducing the hybridization rate (**Figure 4a**).

256 To assess whether the RiboJ insulator might affect the stability of secondary structures  
257 that are crucial to the TES's function, we performed thermodynamic modelling of the binding  
258 between the toehold switch region of the mRNA and the tuner sRNA for variants of the TES  
259 design with and without RiboJ present (**Materials and Methods**). Simulations showed a 40%  
260 drop in predicted Gibbs free energy of the reactants when RiboJ was removed (-40.5 kcal/mol  
261 with versus -65 kcal/mol without RiboJ; **Figure 4b**). This suggests that binding between  
262 sRNAs and the THS may be hampered by interactions with the RiboJ insulator, lowering the  
263 effective translation initiation rate of the RBS controlled by the toehold switch and  
264 subsequently the overall performance of the devices.

265 To experimentally test these predictions, non-insulated variants of the TES and tunable  
266 NOT gate were constructed in which RiboJ was removed. Characterization of these devices  
267 showed major improvements in overall performance (**Figures 4c** and **4d**). The TES saw more  
268 than a doubling in the dynamic range and 10-fold increase in the fold-change between 'on'  
269 and 'off' states across low and high tuner activity levels compared to the original design (**Table**  
270 **1**). In addition, the fraction of intersection of the output YFP fluorescence distributions dropped

271 by >50%. The tunable NOT gate saw more modest improvements with a 73% increase in the  
272 fold-change at high tuner activity levels, but an overall drop of 66% in the range of transition  
273 points ( $K$  values) that could be achieved (**Table 1**). These results highlight an important  
274 consideration often ignored. When using RNA-based devices that require proper formation of  
275 secondary structures, care must be taken in looking at how multiple devices relying on mRNA  
276 folding to function could interfere with each other, leading to cryptic failure modes.

277 Another counterintuitive change in the TES's response function after RiboJ removal  
278 was the large drop in output YFP fluorescence from 26 to 3 arbitrary units (a.u.) when no input  
279 or tuner was present (**Figure 4c**). Similar drops of between 4- and 11-fold were also seen for  
280 higher tuner promoter activities. Given that binding of a tuner sRNA to the THS mRNA should  
281 be less hampered when RiboJ is absent, an increase not decrease in output protein production  
282 would be expected. A possible explanation is that the stability of the THS mRNA decreased  
283 after RiboJ was removed. This is supported by recent results that have shown the RiboJ  
284 insulator both stabilizes its mRNA and also boosts the translation initiation rate of a nearby  
285 downstream RBS<sup>46</sup>. The precise mechanisms for this are not well understood but it is thought  
286 that the structural aspect of the RiboJ element at the 5'-end of an mRNA inhibits degradation  
287 by exonucleases, whilst the hairpin at the 3'-end of RiboJ exposes the nearby RBS by reducing  
288 the chance of unwanted secondary structure formation<sup>44,45</sup>.

289 Finally, we combined the non-insulated designs with the sRNA booster plasmid to see  
290 whether further improvements could be made (**Table 1**). For the TES, we found that the  
291 dynamic range had plateaued, with only moderate increases that were mostly at low tuner  
292 promoter activities. In contrast, the fold-change between low and high outputs more than  
293 doubled across tuner promoter activities when compared to the non-insulated design, and a  
294 further drop of >18% was seen in the fractional intersection between the YFP fluorescence  
295 distributions for these output states. The tunable NOT gate showed minor decreases in  
296 performance for many of the measures (**Table 1**). However, the inclusion of the sRNA booster  
297 likely increased overall PhIF concentrations as the transition points from an 'on' to 'off' state  
298 ( $K$  value range) shifted to far below what had been seen for all other designs. This would make  
299 this specific design of value for uses where a weak input signal needs to be inverted and  
300 amplified simultaneously.

301

### 302 ***Towards complex tunable logic***

303 To create larger genetic circuits that implement complex logic, it is vital that a sufficiently  
304 diverse set of logic gates are available for use. Because a NOT gate alone has limited  
305 capabilities, we further modified its design to create a tunable 2-input NOR gate device<sup>7,33</sup>.  
306 The output of a NOR gate is 'on' only when both inputs are 'off' (**Figure 5b**) and crucially this  
307 type of logic gate is functionally complete (i.e. any combinatorial logic function can be

308 implemented using NOR gates alone). In our new device, we added a further inducible input  
309 promoter,  $P_{BAD}$ , directly before the existing  $P_{tet}$  input promoter, and included the associated  
310 sensor system (i.e. *araC* gene) to allow activity of the  $P_{BAD}$  promoter to be controlled by the  
311 concentration of L-Arabinose (**Figure 5a**). Our modifications were made to the existing NOT  
312 gate design that included the RiboJ insulator because this produced the largest tunable range  
313 for the 'on' to 'off' transition point.

314 To assess the function of the tunable NOR gate, the activities of both input promoters  
315  $P_{BAD}$  and  $P_{tet}$ , and the tuner promoter  $P_{tac}$  were varied by culturing cells harboring the device  
316 in different concentrations of L-Arabinose, aTc and IPTG, respectively (**Materials and**  
317 **Methods**). The two-dimensional response functions from these experiments (**Figure 5c**)  
318 showed that NOR logic was successfully implemented and that the transition point from low  
319 to high output for both inputs was simultaneously shifted to lower input promoter activities when  
320 the tuner promoter was highly active (**Figure 5c**, right panel). Considering each input promoter  
321 separately, this resulted in the transition point between 'on' and 'off' states shifting by 16- and  
322 6-fold for  $P_{BAD}$  and  $P_{tet}$ , respectively.

323 Interestingly, unlike the NOT gate, even at high tuner promoter activities, the dynamic  
324 range was better maintained, dropping at most 35%, and the fold-change between 'on' and  
325 'off' states remained above 4- and 8-fold for low and high tuner promoter activities, respectively  
326 (**Supplementary Table S3**). Furthermore, the improved separation of these states leads to  
327 smaller intersections in the output YFP distributions compared to the NOT gate. This was  
328 especially evident when comparing NOR gate states where both input promoters were  
329 simultaneously 'off' or 'on' with only a ~5% intersection (**Supplementary Table S3**).

330 The cause of this improvement is not clear but may relate to the  $P_{BAD}$  promoter  
331 insulating expression of the *phIF* gene from transcriptional read-through originating from the  
332 tuner transcription unit that is located directly upstream in the DNA (**Supplementary Figure**  
333 **S3**). Without this insulating effect, read-through would cause elevated expression of PhIF,  
334 even when the input promoters are off, and potentially lead to a partial switch in the output  
335 when the tuner promoter is active (as seen for the original NOT gate, **Figure 2b**). Such a  
336 mechanism could also account for the elevated output levels for the TES when the input  
337 promoter is off, but the tuner promoter activity is increased (**Figure 1c**).

338

## 339 Discussion

340 In this work, we have developed a new class of genetic device where an additional tuner input  
341 is able to dynamically change key features of the device's response function. This was  
342 achieved by employing a regulatory motif that allows for the transcription and translation rate  
343 of a gene to be controlled by the activity of multiple input promoters. Connecting this TES to

344 a number of small molecule sensors, we were able to demonstrate its ability to shift the 'on'  
345 and 'off' output states by 4.5- and 28-fold, respectively (**Figure 1**). Furthermore, we showed  
346 how the TES could be incorporated into genetic NOT and NOR gates to enable tuning of the  
347 crucial transition point between an 'on' and 'off' state over >6-fold range (**Figure 2**). This made  
348 the gates more broadly compatible with other components where matching of transition points  
349 to high and low output levels is essential for effective propagation of biological computations  
350 <sup>7,22</sup>. Unfortunately, the performance of the tunable devices varied for differing tuner inputs,  
351 leading to a trade-off between performance and the level of tuning required. Mathematical and  
352 biophysical modelling of the TES helped to uncover: 1. the importance of ensuring sufficient  
353 tuner sRNA is present to fully activate the THS (**Figure 3**), and 2. the presence of possible  
354 detrimental interactions between a self-cleaving ribosome used to insulate protein expression  
355 from genetic context and the THS that relies on the correct folding of an RNA secondary  
356 structure to function properly (**Figure 4**). Modified designs that addressed these concerns  
357 demonstrated improved performance for the TES in both cases, but only minor improvements  
358 in the fold-change of the tunable NOT gate when the self-cleaving ribosome was removed  
359 (**Table 1**). By combining these two modifications into a single system, further improvements  
360 were observed for the TES, but not the tunable NOT gate when compared to the original  
361 designs (**Table 1**). In contrast, the NOR gate behaved more consistently across tuner activity  
362 levels and displayed better performance with greater separation of 'on' and 'off' states. To the  
363 best of our knowledge the simultaneous control of transcription and translation to tune the  
364 response function of a genetic device has not been shown before, making this work a valuable  
365 resource for others to build on. Furthermore, unlike other attempts at tuning the response of  
366 devices through mutation of protein components to alter catalytic rates <sup>47</sup>, our method allows  
367 for dynamic changes to a response function using simple to control transcriptional signals (i.e.  
368 by the use of appropriate promoters).

369 A difficulty when using THSs to regulate gene expression is that high relative  
370 concentrations of sRNA are required to achieve a strong enough activation of mRNA  
371 translation. This stems from the regulatory mechanism relying purely on base-pairing of the  
372 sRNA to THS, which places limits on the binding affinity that can be achieved. A possible  
373 means of increasing the affinity between these species would be to exploit RNA chaperones  
374 such as Hfq <sup>48,49</sup>. In prokaryotes, sRNAs that associate with Hfq play a variety of roles from  
375 inhibiting and activating translation, to affecting the stability of a target mRNA <sup>50-52</sup>. In some  
376 cases, these effects are significant. For example, it has been shown *in vitro* that Hfq increases  
377 by 30- to 50-fold the binding affinity of the DsrA sRNA to the leader of the *rpoS* mRNA <sup>53</sup>.  
378 Designing *de novo* sRNA that binds to Hfq to increase their affinity to a target mRNA has been  
379 demonstrated for both activation <sup>48</sup> and inhibition <sup>49</sup> of translation initiation. In both cases, Hfq  
380 binding scaffolds from endogenous genes (e.g. *micC*) are fused with a targeting sequence.

381 This approach could be employed in future TES designs. In fact, previous work that used Hfq  
382 associated sRNAs to implement a metabolically cheap negative feedback control loop created  
383 a useful repressive tuning element that could be directly used in our system<sup>49</sup>. By combining  
384 the findings from that study with ours and incorporating recent improvements in THS design  
385 <sup>6</sup>, it should be possible to make further strides towards high-performance tunable genetic  
386 devices.

387 An interesting future direction opened up by the adaptive nature of our devices is the  
388 possibility of incorporating many of them into larger circuits. This would allow many parts of a  
389 circuit to be tuned simultaneously to maximize the compatibility between components and  
390 optimize the behavior of the overall system. Unlike a typical design-build-test cycle that  
391 requires the reassembly of a genetic circuit with a new combination of parts if malfunctions  
392 are detected, this work supports a design-build-test-*tune* cycle where time consuming and  
393 costly reassembly can be avoided. Rather than reassembling a circuit after each cycle, parts  
394 can instead be dynamically tuned until they work correctly in unison. In this context, the use  
395 of sensitivity analysis during circuit design would offer valuable insight into specific  
396 components where even small deviations in behavior would adversely impact overall circuit  
397 function <sup>54</sup>. These would be ideal candidates to be encoded using tunable devices to allow for  
398 tweaking at these critical points. Furthermore, the use of new microfluidic culturing systems  
399 and online machine learning algorithms offers a way to rapidly discover the precise tuner  
400 inputs needed to achieve specific circuit functions under fluctuating environmental conditions  
401 <sup>55-58</sup>.

402 Some practical challenges are raised by the additional tuner input in our devices.  
403 Systems composed of numerous tunable devices will require a large number of tuner inputs  
404 to be controlled simultaneously. If external signals are to be used, then a unique sensor is  
405 required for each tuner input, as well as the capability to be able to control the environment to  
406 provide the correct set of input signals over time. Although the range of small molecule <sup>35</sup> and  
407 light based <sup>47,59</sup> sensing systems available to bioengineers in *E. coli* has grown over recent  
408 years, the ability to control many environmental factors (e.g. small molecule concentrations  
409 and light intensities) simultaneously remains difficult. However, external control is not the only  
410 way to tune the behavior of these devices. The use of promoters as inputs and outputs allows  
411 them to be controlled by connecting them directly to the many transcriptional signals used  
412 natively in a cell. This offers the advantage of tapping into the cells innate capacity to sense  
413 and respond to its environment and internal protein synthesis demands. Alternatively, if an  
414 adaptive circuit is not required, sensors controlling the tuning inputs could be replaced once a  
415 working configuration is found with constitutive promoters of an identical strength. This would  
416 still reduce the reassembly required to a single step once the correct combination of tuning

417 inputs is found and remove the need for active control of the environment to provide necessary  
418 stimuli for sensors.

419 When designing our tunable devices, we observed deviations between the  
420 experimental and modelled responses. Further investigation suggested that this may be due  
421 to retroactivity<sup>36,37</sup>, specifically whereby expression of the output reporter protein places a  
422 significant burden on the host cell (**Supplementary Text S2**). Recently, there has been  
423 increased interest in the role of burden<sup>60</sup> impacting upon the function of large synthetic genetic  
424 systems and attempts made to help mitigate its effect<sup>61</sup>. One approach has been to create  
425 intracellular resource allocation schemes based on split exogenous RNAPs<sup>62</sup>. These limit the  
426 maximum burden a circuit can impose by providing pools of transcriptional resources that are  
427 orthogonal to the endogenous ones. This helps to reduce the chance of large unpredictable  
428 physiological changes in the cell that might affect the function of synthetic circuits. Because  
429 our tunable devices can have their sensitivity dynamically altered (i.e. transition point can  
430 occur for weaker inputs), they offer another means of adapting to the reduced availability of  
431 shared cellular resources. They could also be used to boost the expression of downstream  
432 components to mitigate retroactivity effects or even be used to cap to maximum levels of  
433 resource that can be used by a circuit (i.e. tuning the levels of several devices concurrently to  
434 ensure protein expression does not exceed a fixed level).

435 For synthetic biology to have a broad and lasting impact outside of the carefully  
436 controlled conditions of a lab, it is vital that means are developed to construct adaptive genetic  
437 circuits able to maintain their functionality when exposed to unexpected environmental  
438 changes or shifts in host cell physiology<sup>63</sup>. By combining advances in biological control  
439 engineering<sup>61,63-67</sup> with the tunable genetic devices developed in this work, bioengineers have  
440 a complementary set of tools capable of taking steps towards this goal.

441

## 442 **Materials and Methods**

### 443 ***Strains and media***

444 Cloning was performed using *Escherichia coli* strain DH5- $\alpha$  ( $F^-$  *endA1 glnV44 thi-1 recA1*  
445 *relA1 gyrA96 deoR nupG purB20  $\phi$ 80dlacZ $\Delta$ M15  $\Delta$ (*lacZYA-argF*)U169, *hsdR17*( $r_K^- m_K^+$ ),  $\lambda^-$ )  
446 (New England Biolabs, C29871). Device characterization was performed using BL21 Star  
447 (DE3) ( $F^-$  *ompT hsdS<sub>B</sub> (r<sub>B</sub><sup>-</sup>, m<sub>B</sub><sup>-</sup>) gal dcm rne-131 [DE3]*) (Thermo Fisher Scientific, C601003).  
448 For cloning, cells were grown in LB Miller broth (Sigma-Aldrich, L3522). For device  
449 characterization, cells were grown in M9 minimal media supplemented with glucose containing  
450 M9 salts (6.78 g/L Na<sub>2</sub>HPO<sub>4</sub>, 3 g/L KH<sub>2</sub>PO<sub>4</sub>, 1 g/L NH<sub>4</sub>Cl, 0.5 g/L NaCl) (Sigma-Aldrich,  
451 M6030), 0.34 g/L thiamine hydrochloride (Sigma T4625), 0.4% D-glucose (Sigma-Aldrich,  
452 G7528), 0.2% casamino acids (Acros, AC61204-5000), 2 mM MgSO<sub>4</sub> (Acros, 213115000),*

453 and 0.1 mM CaCl<sub>2</sub> (Sigma-Aldrich, C8106). Antibiotic selection was performed using 50 µg/mL  
454 kanamycin (Sigma-Aldrich, K1637) or 50 mg/mL spectinomycin (Santa Cruz Biotechnology,  
455 sc-203279). Induction of sensor systems was performed using anhydrotetracycline (aTc)  
456 (Sigma-Aldrich, 37919), isopropyl β-D-1-thiogalactopyranoside (IPTG) (Sigma-Aldrich, I6758)  
457 and L-Arabinose (Ara) (Sigma-Aldrich, A3256).

458

### 459 **Genetic device synthesis and assembly**

460 Plasmids containing the TES and tunable NOT gate devices were constructed by gene  
461 synthesis of the individual transcriptional units (e.g. tuner sRNA, THS-*yfp*, THS-*phIF* and *yfp*),  
462 (GeneArt, Thermo Fisher Scientific) and insertion of these elements into a pAN1201 plasmid  
463 backbone. pAN1201 provides all the sensor systems used for induction of the input promoters.  
464 Assembly was performed by first PCR of the synthesized transcriptional units and the  
465 pAN1201 plasmid (without the *lacZα* region normally used for blue/white screening) with all  
466 primers containing a 20 bp tail homologous sequence to the previous or subsequent region in  
467 the desired assembly. Gibson assembly (New England Biolabs, E2611S) was then used to  
468 scarlessly assemble these fragments into a complete plasmid. The plasmid used to boost  
469 tuner sRNA levels (pVB005) was fully synthesized (GeneArt, Thermo Fisher Scientific). The  
470 plasmid containing the tunable NOR gate device (pVB006) was constructed by first PCR  
471 amplification of the pAN1720 plasmid (without the *lacZα* region normally used for blue/white  
472 screening) using primers containing an EcoRI restriction site at the 5'-end and a NotI restriction  
473 site at the 3'-end. The tunable NOR gate DNA insert was synthesized in three parts (Integrated  
474 DNA Technologies) which were assembled using a standard Golden Gate assembly method  
475 (New England Biolabs, E1601S) to create a full-length linear insert. This was designed to  
476 contain complementary EcoRI and NotI restriction sites to the amplified pAN1720 fragment.  
477 Both linear DNA fragments were finally used in a standard restriction digest using EcoRI (New  
478 England Biolabs, R3101) and NotI (New England Biolabs, R3189), and then a ligation reaction  
479 (New England Biolabs, M0202S) to assemble the complete pVB006 plasmid. All plasmids  
480 were sequence verified by Sanger sequencing (Eurofins Genomics). Annotated plasmid maps  
481 of all devices are provided in **Supplementary Figure S3** and **Supplementary File S2**.

482

### 483 **Genetic device characterization**

484 Single colonies of cells transformed with the appropriate genetic constructs were inoculated  
485 in 200 µL M9 media supplemented with glucose and necessary antibiotics for selection in a  
486 96-well microtiter plate (Thermo Fisher Scientific, 249952) and grown for 16 hours in a shaking  
487 incubator (Stuart, S1505) at 37 °C and 1250 rpm. Following this, cultures were diluted 9:1600  
488 (15 µL into 185 µL, with 15 µL of this dilution loaded into 185 µL) in glucose supplemented M9  
489 media with necessary antibiotics for selection and grown for 3 hours at the same conditions.

490 Next, the cultures were diluted 1:45 (10  $\mu$ L into 140  $\mu$ L) into supplemented M9 media with  
491 necessary antibiotics for selection and any required inducers in a new 96-well microtiter plate  
492 (Thermo Fisher Scientific, 249952) and grown at 37 °C and 1250 rpm for 5 hours. Finally, the  
493 cells were diluted 1:10 (10  $\mu$ L into 90  $\mu$ L) in phosphate-buffered saline (PBS) (Gibco,18912-  
494 014) containing 2 mg/mL kanamycin to halt translation and incubated at room temperature for  
495 1 hour to allow for maturation of the YFP before performing flow cytometry.

496

#### 497 **Flow cytometry**

498 YFP fluorescence of individual cells was measured using an Acea Biosciences NovoCyte  
499 3000 flow cytometer equipped with a NovoSampler to allow for automated collection from 96-  
500 well microtiter plates. Cells were excited using a 488 nm laser and measurements were taken  
501 using a 530 nm detector. A flow rate of 40  $\mu$ L/min was used to collect at least  $10^5$  cells for all  
502 measured conditions. Automated gating of events using the forward (FSC-A) and side scatter  
503 (SSC-A) channels was performed for all data using the FlowCal Python package version 1.2  
504 <sup>68</sup> and the density2d function with parameters: channels = ['FSC-A', 'SSC-A'], bins = 1024,  
505 gate\_fraction = 0.5, xscale = 'logicle', yscale = 'logicle', and sigma = 10.0.

506

#### 507 **Autofluorescence correction**

508 To measure YFP fluorescence from our constructs it was necessary to correct for the  
509 autofluorescence of cells. An autofluorescence control strain containing the pAN1201 plasmid  
510 <sup>7</sup>, which does not express YFP but contains the same backbone as our genetic devices, was  
511 measured using flow cytometry under the same culturing conditions as for characterization.  
512 Measurements were taken from three biological replicates and an average of the medians of  
513 the gated distributions was subtracted from the gated YFP fluorescence flow cytometry data  
514 of the characterized devices, as in previous work <sup>7</sup>.

515

#### 516 **Characterization of sensor systems in relative promoter units (RPU)**

517 To allow for inputs to our devices to be controlled in standardized relative promoter units  
518 (RPUs) <sup>7,69</sup>, calibration curves for the two sensor systems were generated to enable a  
519 conversion between a chemical inducer concentration and the relative promoter activity of  
520 each sensors' output promoter ( $P_{tac}$  and  $P_{tet}$ ). Cells transformed with plasmids pAN1718 and  
521 pAN1719 for  $P_{tac}$  and  $P_{tet}$ , respectively, and the pAN1717 RPU standard <sup>7</sup>, were cultured in  
522 the same way as the characterization experiments. Flow cytometry was used to measure YFP  
523 fluorescence which was further corrected for cell autofluorescence. RPU values were then  
524 calculated by dividing the YFP output from the sensor by the YFP output from the RPU  
525 standard and a Hill function fitted to the resultant data (**Supplementary Figure S1**).

526



## 527 **Quantifying histogram intersections**

528 The fraction of intersection  $H$  between two histograms (e.g. flow cytometry fluorescence  
529 distributions),  $x$  and  $y$ , was calculated using,

$$530 \quad H(x, y) = \sum_{i=1}^n \frac{\min(x_i, y_i)}{x_i}. \quad (1)$$

531 Here, histograms  $x$  and  $y$  are divided into  $n$  bins that correspond to identical ranges of values  
532 for each, with  $x_i$  and  $y_i$  denoting the value of bin  $i$  for histogram  $x$  or  $y$ , respectively.

533

## 534 **Predicting RNA binding and secondary structure**

535 To predict the binding and secondary structure of the toehold switch and tuner sRNA (**Figure**  
536 **3**), thermodynamic modelling was performed using the NUPACK web application <sup>70</sup>. All  
537 simulations were run using the parameters: nucleic acid = RNA, temperature = 37 °C and the  
538 concentration of toehold switch mRNA was set to  $5 \times 10^{-4}$   $\mu$ M. The switch sequence mRNA  
539 and the switch sequence mRNA with an upstream cleaved RiboJ were simulated  
540 independently with additional parameters strand species = 1 and a maximum complex size =  
541 1. The toehold switch mRNA with and without an upstream RiboJ sequence were also  
542 simulated in the presence of trigger sRNA set to a concentration of  $7 \times 10^{-5}$   $\mu$ M with additional  
543 parameters: strand species = 1 and a maximum complex size = 1. Full sequences are given  
544 in **Supplementary Table S2**.

545

## 546 **Computational analyses and data fitting**

547 All computational analyses were performed using Python version 3.6.6. Response functions  
548 for the TES designs were generated by fitting median values of YFP fluorescence from flow  
549 cytometry data to a Hill function of the form

$$550 \quad y = y_{\min} + (y_{\max} - y_{\min}) \frac{x^n}{K^n + x^n}, \quad (2)$$

551 where  $y$  is the output YFP fluorescence (in arbitrary units),  $y_{\min}$  and  $y_{\max}$  are the minimum and  
552 maximum output YFP fluorescence (in arbitrary units), respectively,  $K$  is the input promoter  
553 activity (in RPU units) at which the output is halfway between its minimum and maximum,  $n$  is  
554 the Hill coefficient, and  $x$  is the input promoter activity (in RPU units). Response functions for  
555 the tunable NOT gates were generated in a similar way using a Hill function of the form

$$556 \quad y = y_{\min} + (y_{\max} - y_{\min}) \frac{K^n}{K^n + x^n}. \quad (3)$$

557 Fitting of data was performed using non-linear least squares and the `curve_fit` function from  
558 the SciPy.integrate Python package version 1.1.

559

## 560 **Numerical simulation**

561 The deterministic ODE model (**Supplementary Text S1**) was simulated using the odeint  
562 function of the SciPy.integrate Python package version 1.1 with default parameters. The delay  
563 differential equations (**Supplementary Text S2**) were simulated using the  
564 DifferentialEquations module version 6.10 using the Bogacki-Shampine 3/2 method running  
565 in Julia version 1.3. Stochastic simulations of the biochemical model (**Supplementary Text**  
566 **S1**) were performed using the tau-leap method in COPASI <sup>71</sup> version 4.24 with the following  
567 settings: number of iterations (simulations) = 4000, duration = 100 min, interval size = 1 min,  
568 number of intervals = 100 and the starting in steady state option selected. Initial steady-state  
569 conditions for the simulation are calculated automatically by COPASI using a damped Newton  
570 method.

571

### 572 ***Visualization of genetic designs***

573 All genetic diagrams are shown using Synthetic Biology Open Language Visual (SBOL Visual)  
574 notation <sup>72</sup>. SBOL Visual diagrams were generated using the DNAplotlib Python package <sup>73,74</sup>  
575 version 1.0 which were then annotated and composed with OmniGraffle version 7.9.2.

576

### 577 ***Data availability***

578 Systems Biology Markup Language (SBML) file implementing a model of the TES can be  
579 found in **Supplementary File S1**. Annotated sequence files in GenBank format for all  
580 plasmids are available in **Supplementary File S2**. All plasmids are available from Addgene  
581 (#127185–127189).

582

### 583 **Acknowledgements**

584 The authors wish to acknowledge the assistance of Dr. Andrew Herman and Dr. Lorena Sueiro  
585 Ballesteros of the University of Bristol Faculty of Biomedical Sciences Flow Cytometry Facility,  
586 and Bettina Frank of the Anderson Lab for help in preliminary plate reader assays. This work  
587 was supported by BrisSynBio, a BBSRC/EPSRC Synthetic Biology Research Centre grant  
588 BB/L01386X/1 (M.d.B., T.E.G.), EPSRC/BBSRC Centre for Doctoral Training in Synthetic  
589 Biology grant EP/L016494/1 (V.B.), the EU Horizon 2020 research project COSY-BIO grant  
590 766840 (M.d.B), and a Royal Society University Research Fellowship grant UF160357  
591 (T.E.G.)

592

### 593 **Author Contributions**

594 T.E.G. conceived of the study. V.B., T.E.G. and G.A.M. performed the experiments. V.B.,  
595 M.d.B. and T.E.G. developed the mathematical models. V.B. analyzed the data. T.E.G., V.B.,  
596 M.d.B. and G.A.M. wrote the manuscript.

597

598 **Conflicts of Interest**

599 The authors declare no competing financial interests.

## 600 References

- 601 1. Brophy, J. A. N. & Voigt, C. A. Principles of genetic circuit design. *Nat. Methods* **11**, 508  
602 (2014).
- 603 2. Greco, F. V., Tarnowski, M. J. & Gorochofski, T. E. Living computers powered by  
604 biochemistry. *The Biochemist* **41**, 14–18 (2019).
- 605 3. Slomovic, S., Pardee, K. & Collins, J. J. Synthetic biology devices for in vitro and in vivo  
606 diagnostics. *Proc. Natl. Acad. Sci.* **112**, 14429 (2015).
- 607 4. Andrews, L. B., Nielsen, A. A. K. & Voigt, C. A. Cellular checkpoint control using  
608 programmable sequential logic. *Science* **361**, eaap8987 (2018).
- 609 5. Bashor, C. J. *et al.* Complex signal processing in synthetic gene circuits using  
610 cooperative regulatory assemblies. *Science* **364**, 593 (2019).
- 611 6. Green, A. A. *et al.* Complex cellular logic computation using ribocomputing devices.  
612 *Nature* **548**, 117 (2017).
- 613 7. Nielsen, A. A. K. *et al.* Genetic circuit design automation. *Science* **352**, aac7341 (2016).
- 614 8. Moon, T. S., Lou, C., Tamsir, A., Stanton, B. C. & Voigt, C. A. Genetic programs  
615 constructed from layered logic gates in single cells. *Nature* **491**, 249 (2012).
- 616 9. Gao, X. J., Chong, L. S., Kim, M. S. & Elowitz, M. B. Programmable protein circuits in  
617 living cells. *Science* **361**, 1252 (2018).
- 618 10. Daniel, R., Rubens, J. R., Sarpeshkar, R. & Lu, T. K. Synthetic analog computation in  
619 living cells. *Nature* **497**, 619 (2013).
- 620 11. Fernandez-Rodriguez, J., Yang, L., Gorochofski, T. E., Gordon, D. B. & Voigt, C. A.  
621 Memory and Combinatorial Logic Based on DNA Inversions: Dynamics and  
622 Evolutionary Stability. *ACS Synth. Biol.* **4**, 1361–1372 (2015).
- 623 12. Hsiao, V., Hori, Y., Rothmund, P. W. & Murray, R. M. A population-based temporal  
624 logic gate for timing and recording chemical events. *Mol. Syst. Biol.* **12**, 869 (2016).
- 625 13. Elowitz, M. B. & Leibler, S. A synthetic oscillatory network of transcriptional regulators.  
626 *Nature* **403**, 335–338 (2000).
- 627 14. Stricker, J. *et al.* A fast, robust and tunable synthetic gene oscillator. *Nature* **456**, 516  
628 (2008).
- 629 15. Niederholtmeyer, H. *et al.* Rapid cell-free forward engineering of novel genetic ring  
630 oscillators. *eLife* **4**, e09771 (2015).
- 631 16. Kong, W., Meldgin, D. R., Collins, J. J. & Lu, T. Designing microbial consortia with  
632 defined social interactions. *Nat. Chem. Biol.* **14**, 821–829 (2018).
- 633 17. Karig, D. *et al.* Stochastic Turing patterns in a synthetic bacterial population. *Proc. Natl.*  
634 *Acad. Sci.* **115**, 6572–6577 (2018).

- 635 18. Cao, Y. *et al.* Programmable assembly of pressure sensors using pattern-forming  
636 bacteria. *Nat. Biotechnol.* **35**, 1087–1093 (2017).
- 637 19. Danino, T., Mondragón-Palomino, O., Tsimring, L. & Hasty, J. A synchronized quorum  
638 of genetic clocks. *Nature* **463**, 326–330 (2010).
- 639 20. Din, M. O. *et al.* Synchronized cycles of bacterial lysis for in vivo delivery. *Nature* **536**,  
640 81–85 (2016).
- 641 21. Canton, B., Labno, A. & Endy, D. Refinement and standardization of synthetic biological  
642 parts and devices. *Nat. Biotechnol.* **26**, 787 (2008).
- 643 22. P. Vaidyanathan *et al.* A Framework for Genetic Logic Synthesis. *Proc. IEEE* **103**,  
644 2196–2207 (2015).
- 645 23. Weinberg, B. H. *et al.* Large-scale design of robust genetic circuits with multiple inputs  
646 and outputs for mammalian cells. *Nat. Biotechnol.* **35**, 453 (2017).
- 647 24. Moser, F. *et al.* Genetic Circuit Performance under Conditions Relevant for Industrial  
648 Bioreactors. *ACS Synth. Biol.* **1**, 555–564 (2012).
- 649 25. Gorochofski, T. E., van den Berg, E., Kerkman, R., Roubos, J. A. & Bovenberg, R. A.  
650 L. Using Synthetic Biological Parts and Microbioreactors to Explore the Protein  
651 Expression Characteristics of *Escherichia coli*. *ACS Synth. Biol.* **3**, 129–139 (2014).
- 652 26. Cardinale, S. & Arkin, A. P. Contextualizing context for synthetic biology – identifying  
653 causes of failure of synthetic biological systems. *Biotechnol. J.* **7**, 856–866 (2012).
- 654 27. Gyorgy, A. *et al.* Isocost Lines Describe the Cellular Economy of Genetic Circuits.  
655 *Biophys. J.* **109**, 639–646 (2015).
- 656 28. Gorochofski, T. E., Avcilar-Kucukgoze, I., Bovenberg, R. A. L., Roubos, J. A. &  
657 Ignatova, Z. A Minimal Model of Ribosome Allocation Dynamics Captures Trade-offs in  
658 Expression between Endogenous and Synthetic Genes. *ACS Synth. Biol.* **5**, 710–720  
659 (2016).
- 660 29. Qian, Y., Huang, H.-H., Jiménez, J. I. & Del Vecchio, D. Resource Competition Shapes  
661 the Response of Genetic Circuits. *ACS Synth. Biol.* **6**, 1263–1272 (2017).
- 662 30. Yeung, E. *et al.* Biophysical Constraints Arising from Compositional Context in Synthetic  
663 Gene Networks. *Cell Syst.* **5**, 11-24.e12 (2017).
- 664 31. Gorochofski, T. E. *et al.* Genetic circuit characterization and debugging using RNA-seq.  
665 *Mol. Syst. Biol.* **13**, 952 (2017).
- 666 32. Gorochofski, T. E. *et al.* Absolute quantification of translational regulation and burden  
667 using combined sequencing approaches. *Mol. Syst. Biol.* **15**, e8719 (2019).
- 668 33. Stanton, B. C. *et al.* Genomic mining of prokaryotic repressors for orthogonal logic  
669 gates. *Nat. Chem. Biol.* **10**, 99–105 (2014).
- 670 34. Green, A. A., Silver, P. A., Collins, J. J. & Yin, P. Toehold Switches: De-Novo-Designed  
671 Regulators of Gene Expression. *Cell* **159**, 925–939 (2014).

- 672 35. Meyer, A. J., Segall-Shapiro, T. H., Glassey, E., Zhang, J. & Voigt, C. A. Escherichia  
673 coli “Marionette” strains with 12 highly optimized small-molecule sensors. *Nat. Chem.*  
674 *Biol.* **15**, 196–204 (2019).
- 675 36. Del Vecchio, D., Ninfa, A. J. & Sontag, E. D. Modular cell biology: retroactivity and  
676 insulation. *Mol. Syst. Biol.* **4**, 161 (2008).
- 677 37. D. Del Vecchio & E. D. Sontag. Engineering principles in bio-molecular systems: From  
678 retroactivity to modularity. in *2009 European Control Conference (ECC)* 658–664  
679 (2009). doi:10.23919/ECC.2009.7074478.
- 680 38. Chen, H., Shiroguchi, K., Ge, H. & Xie, X. S. Genome-wide study of mRNA degradation  
681 and transcript elongation in Escherichia coli. *Mol. Syst. Biol.* **11**, 781 (2015).
- 682 39. Busi, F., Arluison, V. & Régnier, P. Absolute Regulatory Small Noncoding RNA  
683 Concentration and Decay Rates Measurements in Escherichia coli. in *Bacterial*  
684 *Regulatory RNA: Methods and Protocols* (eds. Arluison, V. & Valverde, C.) 231–248  
685 (Springer New York, 2018). doi:10.1007/978-1-4939-7634-8\_14.
- 686 40. Lutz, R. & Bujard, H. Independent and Tight Regulation of Transcriptional Units in  
687 Escherichia Coli Via the LacR/O, the TetR/O and AraC/I1-I2 Regulatory Elements.  
688 *Nucleic Acids Res.* **25**, 1203–1210 (1997).
- 689 41. Dunn, J. J., Studier, F. W. & Gottesman, M. Complete nucleotide sequence of  
690 bacteriophage T7 DNA and the locations of T7 genetic elements. *J. Mol. Biol.* **166**, 477–  
691 535 (1983).
- 692 42. Studier, F. W. & Moffatt, B. A. Use of bacteriophage T7 RNA polymerase to direct  
693 selective high-level expression of cloned genes. *J. Mol. Biol.* **189**, 113–130 (1986).
- 694 43. Hiszczyńska-Sawicka, E. & Kur, J. Effect of Escherichia coli IHF Mutations on Plasmid  
695 p15A Copy Number. *Plasmid* **38**, 174–179 (1997).
- 696 44. Lou, C., Stanton, B., Chen, Y.-J., Munsky, B. & Voigt, C. A. Ribozyme-based insulator  
697 parts buffer synthetic circuits from genetic context. *Nat. Biotechnol.* **30**, 1137 (2012).
- 698 45. Carrier, T. A. & Keasling, J. D. Engineering mRNA stability in E. coli by the addition of  
699 synthetic hairpins using a 5' cassette system. *Biotechnol. Bioeng.* **55**, 577–580 (1997).
- 700 46. Clifton, K. P. *et al.* The genetic insulator RiboJ increases expression of insulated genes.  
701 *J. Biol. Eng.* **12**, 23 (2018).
- 702 47. Landry, B. P., Palanki, R., Dyulgyarov, N., Hartsough, L. A. & Tabor, J. J. Phosphatase  
703 activity tunes two-component system sensor detection threshold. *Nat. Commun.* **9**, 1433  
704 (2018).
- 705 48. Soper, T., Mandin, P., Majdalani, N., Gottesman, S. & Woodson, S. A. Positive  
706 regulation by small RNAs and the role of Hfq. *Proc. Natl. Acad. Sci.* **107**, 9602 (2010).
- 707 49. Kelly, C. L. *et al.* Synthetic negative feedback circuits using engineered small RNAs.  
708 *Nucleic Acids Res.* **46**, 9875–9889 (2018).

- 709 50. Waters, L. S. & Storz, G. Regulatory RNAs in Bacteria. *Cell* **136**, 615–628 (2009).
- 710 51. Storz, G., Opdyke, J. A. & Zhang, A. Controlling mRNA stability and translation with  
711 small, noncoding RNAs. *Curr. Opin. Microbiol.* **7**, 140–144 (2004).
- 712 52. Gottesman, S. Micros for microbes: non-coding regulatory RNAs in bacteria. *Trends*  
713 *Genet.* **21**, 399–404 (2005).
- 714 53. Soper, T. J. & Woodson, S. A. The rpoS mRNA leader recruits Hfq to facilitate  
715 annealing with DsrA sRNA. *RNA* **14**, 1907–1917 (2008).
- 716 54. Feng, X. *et al.* Optimizing Genetic Circuits by Global Sensitivity Analysis. *Biophys. J.* **87**,  
717 2195–2202 (2004).
- 718 55. Postiglione, L. *et al.* Regulation of Gene Expression and Signaling Pathway Activity in  
719 Mammalian Cells by Automated Microfluidics Feedback Control. *ACS Synth. Biol.* **7**,  
720 2558–2565 (2018).
- 721 56. Menolascina, F. *et al.* In-Vivo Real-Time Control of Protein Expression from  
722 Endogenous and Synthetic Gene Networks. *PLOS Comput. Biol.* **10**, e1003625 (2014).
- 723 57. Bandiera, L. *et al.* On-Line Optimal Input Design Increases the Efficiency and Accuracy  
724 of the Modelling of an Inducible Synthetic Promoter. *Processes* **6**, (2018).
- 725 58. Milias-Argeitis, A., Rullan, M., Aoki, S. K., Buchmann, P. & Khammash, M. Automated  
726 optogenetic feedback control for precise and robust regulation of gene expression and  
727 cell growth. *Nat. Commun.* **7**, 12546 (2016).
- 728 59. Baumschlager, A., Aoki, S. K. & Khammash, M. Dynamic Blue Light-Inducible T7 RNA  
729 Polymerases (Opto-T7RNAPs) for Precise Spatiotemporal Gene Expression Control.  
730 *ACS Synth. Biol.* **6**, 2157–2167 (2017).
- 731 60. Ceroni, F., Algar, R., Stan, G.-B. & Ellis, T. Quantifying cellular capacity identifies gene  
732 expression designs with reduced burden. *Nat. Methods* **12**, 415–418 (2015).
- 733 61. Ceroni, F. *et al.* Burden-driven feedback control of gene expression. *Nat. Methods* **15**,  
734 387–393 (2018).
- 735 62. Segall-Shapiro, T. H., Meyer, A. J., Ellington, A. D., Sontag, E. D. & Voigt, C. A. A  
736 ‘resource allocator’ for transcription based on a highly fragmented T7 RNA polymerase.  
737 *Mol. Syst. Biol.* **10**, 742 (2014).
- 738 63. Segall-Shapiro, T. H., Sontag, E. D. & Voigt, C. A. Engineered promoters enable  
739 constant gene expression at any copy number in bacteria. *Nat. Biotechnol.* **36**, 352  
740 (2018).
- 741 64. Aoki, S. K. *et al.* A universal biomolecular integral feedback controller for robust perfect  
742 adaptation. *Nature* **570**, 533–537 (2019).
- 743 65. D. Fiore, A. Guarino & M. di Bernardo. Analysis and Control of Genetic Toggle Switches  
744 Subject to Periodic Multi-Input Stimulation. *IEEE Control Syst. Lett.* **3**, 278–283 (2019).

- 745 66. Mishra, D., Rivera, P. M., Lin, A., Del Vecchio, D. & Weiss, R. A load driver device for  
746 engineering modularity in biological networks. *Nat. Biotechnol.* **32**, 1268 (2014).
- 747 67. Del Vecchio, D., Abdallah, H., Qian, Y. & Collins, J. J. A Blueprint for a Synthetic  
748 Genetic Feedback Controller to Reprogram Cell Fate. *Cell Syst.* **4**, 109-120.e11 (2017).
- 749 68. Castillo-Hair, S. M. *et al.* FlowCal: A User-Friendly, Open Source Software Tool for  
750 Automatically Converting Flow Cytometry Data from Arbitrary to Calibrated Units. *ACS*  
751 *Synth. Biol.* **5**, 774–780 (2016).
- 752 69. Kelly, J. R. *et al.* Measuring the activity of BioBrick promoters using an in vivo reference  
753 standard. *J. Biol. Eng.* **3**, 4 (2009).
- 754 70. Zadeh, J. N. *et al.* NUPACK: Analysis and design of nucleic acid systems. *J. Comput.*  
755 *Chem.* **32**, 170–173 (2011).
- 756 71. Hoops, S. *et al.* COPASI—a COMplex PATHway Simulator. *Bioinformatics* **22**, 3067–  
757 3074 (2006).
- 758 72. Madsen Curtis *et al.* Synthetic Biology Open Language Visual (SBOL Visual) Version  
759 2.1. *J. Integr. Bioinforma.* (2019) doi:10.1515/jib-2018-0101.
- 760 73. Der, B. S. *et al.* DNAplotlib: Programmable Visualization of Genetic Designs and  
761 Associated Data. *ACS Synth. Biol.* **6**, 1115–1119 (2017).
- 762 74. Bartoli, V., Dixon, D. O. R. & Goroehowski, T. E. Automated Visualization of Genetic  
763 Designs Using DNAplotlib. in *Synthetic Biology: Methods and Protocols* (ed. Braman, J.  
764 C.) 399–409 (Springer New York, 2018). doi:10.1007/978-1-4939-7795-6\_22.
- 765 75. Chen, Y.-J. *et al.* Characterization of 582 natural and synthetic terminators and  
766 quantification of their design constraints. *Nat. Methods* **10**, 659 (2013).



767 **Figures and captions**

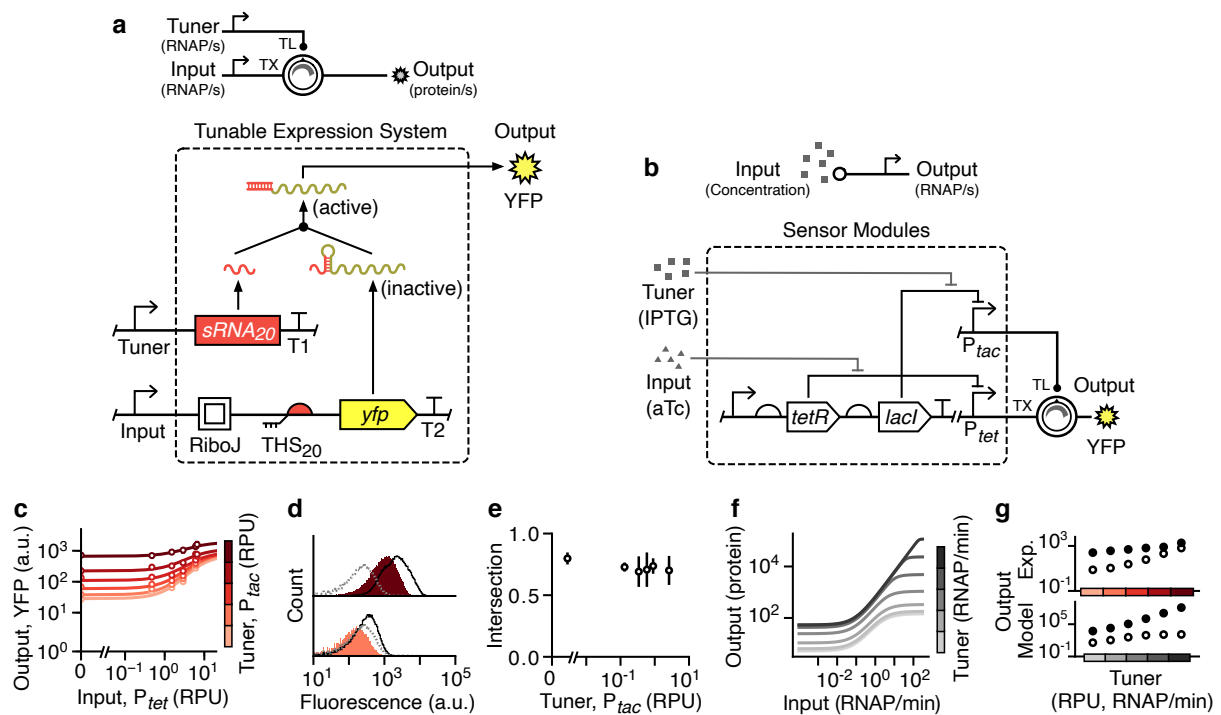

768

769 **Figure 1: Design and characterization of a tunable expression system (TES).** (a)  
770 Schematic of the TES (top) and genetic implementation using a toehold switch (design 20)<sup>34</sup>  
771 to regulate translation (TL) initiation rate of an output protein (bottom, dashed box). Yellow  
772 fluorescent protein (YFP) is used as the output and T1 and T2 correspond to the transcriptional  
773 terminators L3S3P11 and L3S2P21, respectively<sup>75</sup>. (b) Genetic design of the sensor modules  
774 used to drive the main and tuner inputs to the TES. (c) Experimentally measured response  
775 functions for the TES. Points denote the average of three biological replicates and error bars  
776 show  $\pm 1$  standard deviation. Each line shows a fitted Hill function for a fixed tuner input (light–  
777 dark: 0.002, 0.03, 0.15, 0.43, 0.9, 2.6 RPU). (d) Flow cytometry distributions of output YFP  
778 fluorescence when the tuner promoter activity is low (bottom; 0.002 RPU) and high (top; 2.6  
779 RPU). Black outlined distributions correspond to a high input promoter activity (6.6 RPU) and  
780 the filled red distributions to a low input promoter activity (0.002 RPU). Cell autofluorescence  
781 is shown by the dashed grey line. (e) Fraction of intersection between YFP fluorescence  
782 distributions for low (0.002 RPU) and high (6.6 RPU) inputs across varying tuner promoter  
783 activities. (f) Response functions from a deterministic model of the TES (**Supplementary Text**  
784 **S1**). Output shown as the steady state protein level. Line color corresponds to the promoter  
785 activity of the tuner input (light–dark: 0.0001, 0.06, 0.3, 1.5, 7.6, 38, 190 RNAP/min). (g)  
786 Comparison of the output for high (filled circles; 6.6 RPU) and low (unfilled circles; 0.002 RPU)  
787 inputs across a range of tuner promoter activities (Experiment: 0.002, 0.03, 0.15, 0.43, 0.9,  
788 2.6 RPU; Model: 0.0001, 0.3, 1.5, 7.6, 38, 190 RNAP/min).

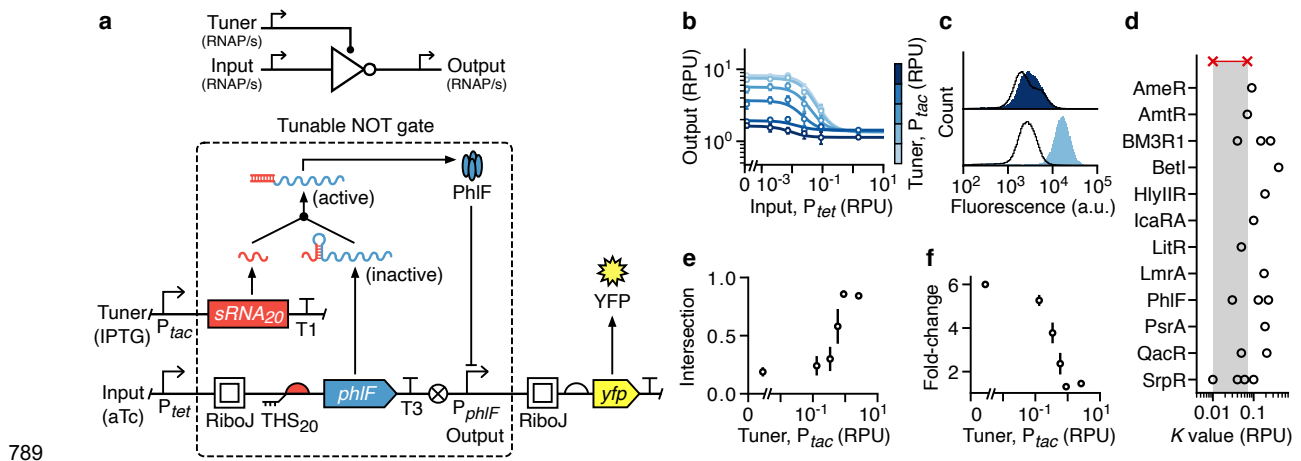

789

790 **Figure 2: Design and characterization of a tunable NOT gate.** (a) Schematic of the tunable  
791 NOT gate (top) and genetic implementation embedding the TES (bottom, dashed box). Yellow  
792 fluorescent protein (YFP) expression is driven by the output promoter and T1 and T3  
793 correspond to the transcriptional terminators L3S3P11 and ECK120033737, respectively <sup>75</sup>.  
794 (b) Experimentally measured response functions of the tunable NOT gate. Points denote the  
795 average of three biological replicates and error bars show  $\pm 1$  standard deviation. Each line  
796 shows a fitted Hill function for a fixed tuner input (light–dark: 0.002, 0.03, 0.15, 0.43, 0.9, 2.6  
797 RPU). (c) Flow cytometry distributions of the output YFP fluorescence from the tunable NOT  
798 gate when the tuner promoter activity is low (bottom; 0.002 RPU) and high (top; 2.6 RPU).  
799 Black outlined distributions correspond to a high input promoter activity (1.5 RPU) and the  
800 filled blue distributions to a low input promoter activity (0.002 RPU). (d) Comparison of the  
801 switching point ( $K$  value) for each repressor-based NOT gate from Cello <sup>7</sup> (black circles) to the  
802 range achievable by the tunable NOT gate (red crosses and shaded regions). (e) Fraction of  
803 intersection between output YFP fluorescence distributions for low (0.002 RPU) and high (1.5  
804 RPU) inputs across varying tuner promoter activities. (f) Fold-change in the median output  
805 YFP fluorescence between low (0.002 RPU) and high (1.5 RPU) inputs across varying tuner  
806 promoter activities.

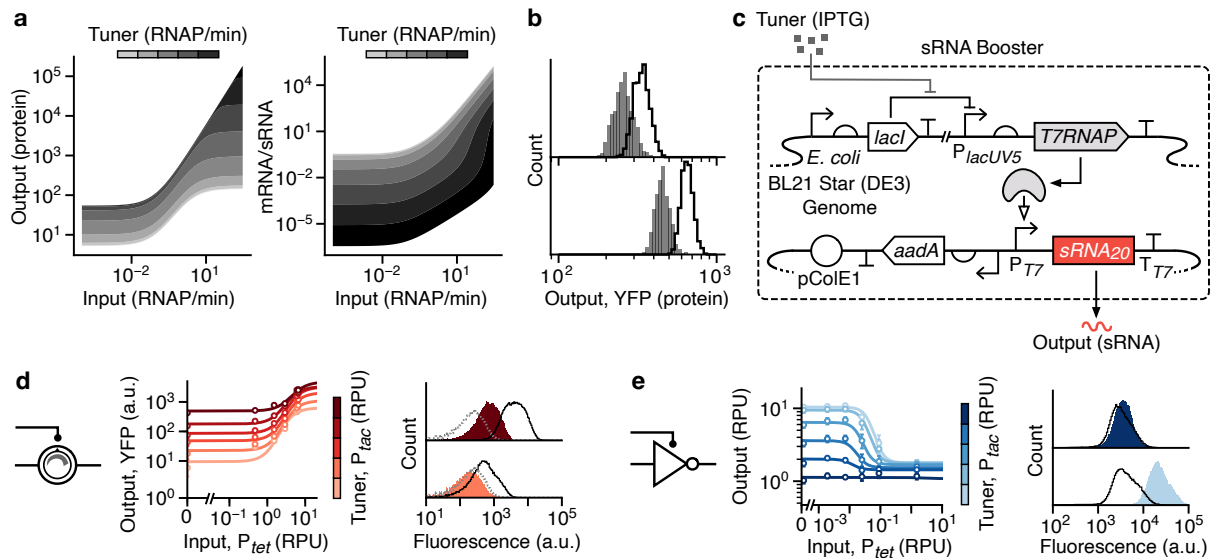

807

808 **Figure 3: Increasing tuner sRNA transcription rate to improve device performance. (a)**  
809 Results of deterministic simulations of the TES model (**Supplementary Text S1**) showing  
810 steady state protein output and THS mRNA to tuner sRNA ratio for a range of input and tuner  
811 promoter activities. Tuner promoter activities are shown in bands between (light–dark) 0.0001,  
812 0.0005, 0.0024, 0.012, 0.056, 0.27, 1.3, 6.4, 31, 150 and 730 RNAP/min, respectively. (b)  
813 Stochastic simulation of the TES model ( $n = 4000$ ) for low (1 RNAP/min; grey) and high (1.5  
814 RNAP/min; green) input promoter activity. Top and bottom panels correspond to low (1.5  
815 RNAP/min) and high (5 RNAP/min) tuner promoter activities, respectively. (c) Genetic design  
816 of the sRNA booster. The *T7RNAP* gene is encoded in the host genome and an additional  
817 plasmid contains a tuner sRNA expression unit. (d) Experimentally measured response  
818 functions (left) and flow cytometry distributions of the YFP fluorescence output (right) for the  
819 TES with the sRNA booster present. (e) Experimentally measured response functions (left)  
820 and flow cytometry distributions of the YFP fluorescence output (right) for the tunable NOT  
821 gate with the sRNA booster present. Points in all response functions denote the average of  
822 three biological replicates and error bars show  $\pm 1$  standard deviation. Each line shows a fitted  
823 Hill function for a fixed tuner input (light–dark: 0.002, 0.03, 0.15, 0.43, 0.9, 2.6 RPU). All flow  
824 cytometry distributions are shown for low (bottom; 0.002 RPU) and high (top; 2.6 RPU) tuner  
825 promoter activity. Black outlined distributions correspond to a high input promoter activity (6.6  
826 RPU for the TES and 1.5 RPU for the NOT gate) and filled red/blue distributions to a low input  
827 promoter activity (0.002 RPU). Cell autofluorescence is shown by the dashed grey line.

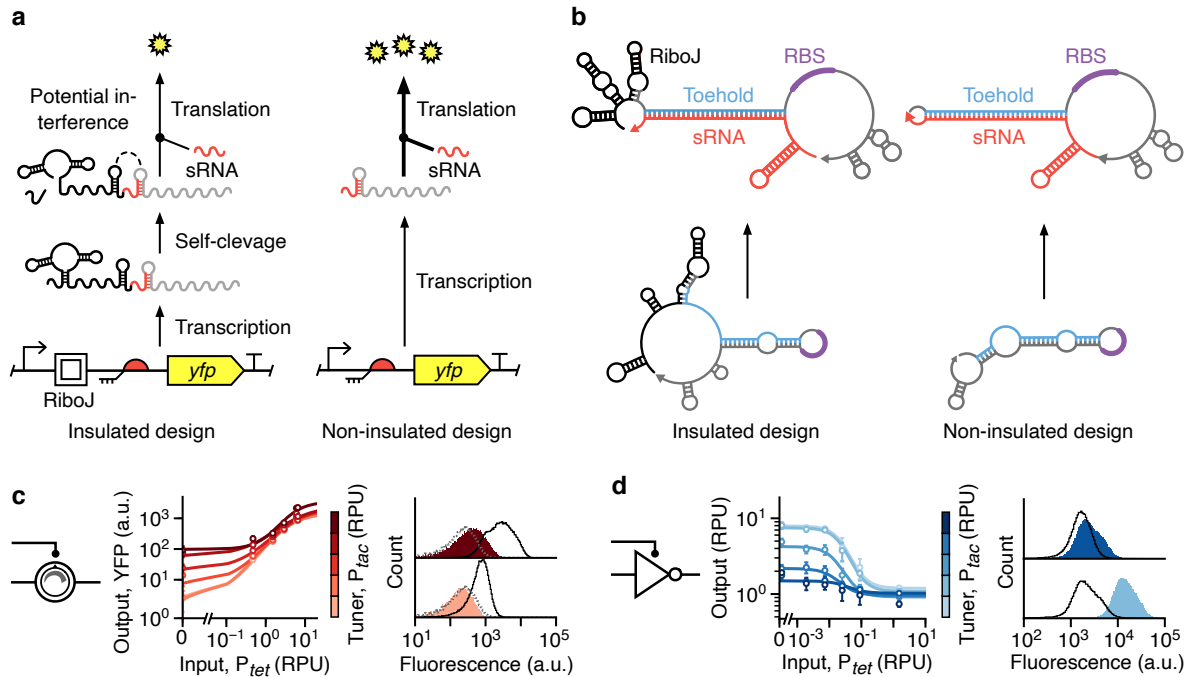

828

829 **Figure 4: Self-cleaving ribozyme insulators affect tunable device performance. (a)**

830 Original designs of both the TES and tunable NOT gate include a RiboJ insulating element,  
 831 which can potentially interfere with binding of the tuner sRNA to the toehold switch. (b) RNA  
 832 secondary structure predictions for THS mRNA alone and with a complimentary tuner sRNA  
 833 bound. Separate structures shown when the RiboJ insulating element is present (left) and  
 834 absent (right). (c) Experimentally measured response functions (left) and flow cytometry  
 835 distributions of the output YFP fluorescence (right) for the TES with the RiboJ insulator  
 836 removed. (d) Experimentally measured response functions (left) and flow cytometry  
 837 distributions of the YFP fluorescence output (right) for the tunable NOT gate with the RiboJ  
 838 insulator removed. Points in all response functions denote the average of three biological  
 839 replicates and error bars show  $\pm 1$  standard deviation. Each line shows a fitted Hill function for  
 840 a fixed tuner input (light–dark: 0.002, 0.03, 0.15, 0.43, 0.9, 2.6 RPU). All flow cytometry  
 841 distributions are shown for low (bottom; 0.002 RPU) and high (top; 2.6 RPU) tuner promoter  
 842 activity. Black outlined distributions correspond to a high input promoter activity (6.6 RPU for  
 843 the TES and 1.5 RPU for the NOT gate) and filled red/blue distributions to a low input promoter  
 844 activity (0.002 RPU). Cell autofluorescence is shown by the dashed grey line.

845

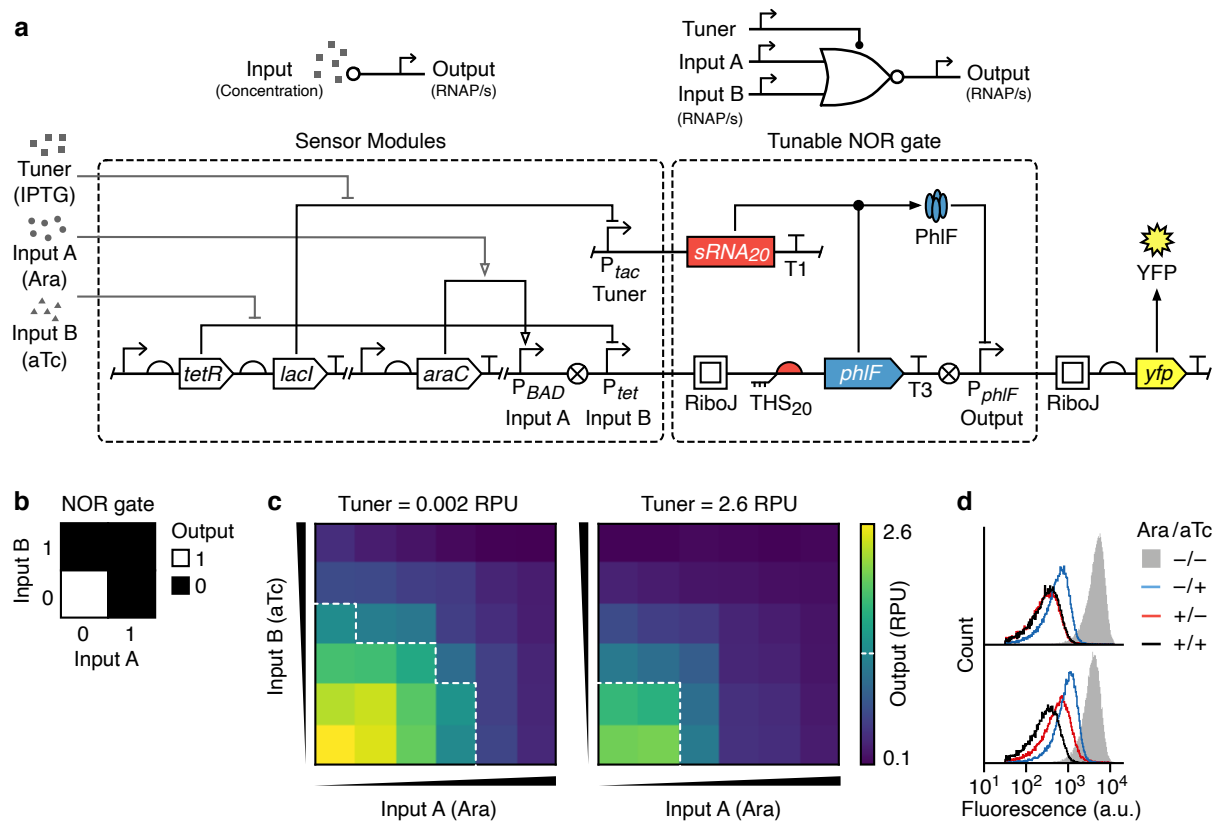

846

847 **Figure 5: Design and characterization of a tunable NOR gate.** (a) Schematic of all the  
 848 sensor systems used (top, left), the tunable NOR gate (top, right), and their genetic  
 849 implementation (bottom, dashed boxes). Yellow fluorescent protein (YFP) expression is driven  
 850 by the output promoter and T1 and T3 correspond to the transcriptional terminators L3S3P11  
 851 and ECK120033737, respectively <sup>75</sup>. (b) Function of a 2-input NOR gate. (c) Heatmaps  
 852 showing the output of the tunable NOR gate for varying input promoter activities (Input A –  
 853  $P_{BAD}$ : 0.008, 0.003, 0.15, 0.5, 2.5, 3.1 RPU; Input B –  $P_{tet}$ : 0.05, 0.5, 1.6, 3.1, 6.4, 7.5 RPU)  
 854 and for low (left) and high (right) tuner promoter activities. Output promoter activities shown  
 855 are average values calculated from flow cytometry data for three biological replicates. White  
 856 dashed line shows an output of 1.2 RPU and denotes the transition point from a high to low  
 857 output. (d) Flow cytometry distributions of the output YFP fluorescence for tuner promoter  
 858 activities of 0.002 RPU (bottom) and 2.6 RPU (top). The four distributions correspond to  
 859 combinations of the absence and presence of L-Arabinose (10 mM) and aTc (50 ng/mL).

860 **Tables**

861 **Table 1: Performance summary of TES and tunable NOT gate.**

| Device                     | Design                    | Dynamic range <sup>a,b</sup><br>(a.u.) |                   | Fold-change <sup>a,c</sup> |                   | Intersection <sup>a,d</sup> |                   | K range<br>(RPU) <sup>g</sup> |
|----------------------------|---------------------------|----------------------------------------|-------------------|----------------------------|-------------------|-----------------------------|-------------------|-------------------------------|
|                            |                           | Low <sup>e</sup>                       | High <sup>f</sup> | Low <sup>e</sup>           | High <sup>f</sup> | Low <sup>e</sup>            | High <sup>f</sup> |                               |
| TES                        | Original                  | 333 ±                                  | 877 ±             | 14 ±                       | 2.4 ±             | 0.78 ±                      | 0.69 ±            | –                             |
|                            |                           | 53                                     | 695               | 1.7                        | 1.2               | 0.06                        | 0.16              |                               |
|                            | sRNA booster <sup>h</sup> | 538 ±                                  | 2064 ±            | 227 ±                      | 5.7 ±             | 0.46 ±                      | 0.35 ±            | –                             |
|                            |                           | 51                                     | 1070              | 297                        | 1.8               | 0.04                        | 0.15              |                               |
| Non-insulated <sup>i</sup> | 882 ±                     | 2149 ±                                 | 445 ±             | 31 ±                       | 0.26 ±            | 0.27 ±                      | –                 |                               |
|                            | 134                       | 409                                    | 412               | 16                         | 0.07              | 0.06                        |                   |                               |
| Combined <sup>j</sup>      | 1550 ±                    | 1712 ±                                 | 1236 ±            | 66 ±                       | 0.15 ±            | 0.22 ±                      | –                 |                               |
|                            | 209                       | 584                                    | 613               | 54                         | 0.04              | 0.04                        |                   |                               |
| NOT gate                   | Original                  | 17280 ±                                | 3512 ±            | 6.0 ±                      | 1.5 ±             | 0.19 ±                      | 0.84 ±            | 0.01–0.07                     |
|                            |                           | 1273                                   | 286               | 0.1                        | 0.1               | 0.04                        | 0.02              |                               |
|                            | sRNA booster <sup>h</sup> | 22040 ±                                | 2170 ±            | 5.8 ±                      | 0.9 ±             | 0.13 ±                      | 0.85 ±            | 0.01–0.06                     |
|                            |                           | 1601                                   | 654               | 0.3                        | 0.3               | 0.07                        | 0.02              |                               |
| Non-insulated <sup>i</sup> | 17466 ±                   | 4061 ±                                 | 6.8 ±             | 2.6 ±                      | 0.11 ±            | 0.56 ±                      | 0.02–0.04         |                               |
|                            | 1926                      | 827                                    | 0.3               | 0.4                        | 0.03              | 0.08                        |                   |                               |
| Combined <sup>j</sup>      | 27751 ±                   | 2383 ±                                 | 6.0 ±             | 0.9 ±                      | 0.08 ±            | 0.90 ±                      | 0.003–0.02        |                               |
|                            | 3104                      | 165                                    | 0.6               | 0.1                        | 0.05              | 0.03                        |                   |                               |

- 862 a. Average values are shown ± 1 standard deviation calculated from flow cytometry data for three  
863 biological replicates.
- 864 b. Dynamic range calculated as the absolute difference in YFP fluorescence between low and high  
865 inputs (0.002 and 6.6 RPU for the TES, and 0.002 and 1.5 RPU for the NOT gate, respectively).
- 866 c. Fold-change in YFP fluorescence (corrected for cell autofluorescence) for low and high inputs  
867 (0.002 and 6.6 RPU for the TES, and 0.002 and 1.5 RPU for the NOT gate, respectively).
- 868 d. Fraction of intersection between the flow cytometry YFP fluorescence distributions for low and high  
869 inputs (0.002 and 6.6 RPU for the TES, and 0.002 and 1.5 RPU for the NOT gate, respectively)  
870 **(Materials and Methods)**.
- 871 e. Performance measured for a low tuner input (0.002 RPU). This is the expected promoter activity of  
872 the  $P_{tac}$  promoter in our designs.
- 873 f. Performance measured for a high tuner input (2.61 RPU). This is the expected promoter activity of  
874 the  $P_{tac}$  promoter in our designs.
- 875 g. Range of K values from Hill functions fitted to experimental data.
- 876 h. Original designs (**Figures 1a** and **2a**) with the sRNA booster system (**Figure 3c**).
- 877 i. Design has the RiboJ insulating element removed (**Figure 4a**).
- 878 j. Design has the RiboJ insulating element removed (**Figure 4a**), and sRNA booster system present  
879 (**Figure 3c**).
